# Supplementary material for: Remediation of PAHs contaminated industrial soils by hypochlorous acid: performance and mechanisms
Source: Royal Society of Chemistry journal article supplement (doi:10.1039/d2ra00514j), 2022-01-01
Supplement: d2ra00514j1.pdf [file d2ra00514j1.pdf]

Supplementary Data

For

Remediation of PAHs contaminated industrial soils by hypochlorous acid:

Performance and mechanisms

Yufeng He, Xiaojun Hu\*, Jingxian Jiang\*, Jinyang Zhang, Fuwen Liu

School of Chemical and Environmental Engineering, Shanghai Institute of Technology,  
Shanghai 201418, China

\*Corresponding Authors.

E-mail address: hu-xj@mail.tsinghua.edu.cn, jxjiang@zju.edu.cn

Table S1 The physical and chemical properties of the contaminated industrial soil

| Parameter                | Value | Unit    |
|--------------------------|-------|---------|
| Moisture content         | 27.50 | %       |
| Cation exchange capacity | 20.20 | cmol/kg |
| pH (in water)            | 7.30  |         |
| Soil organic matter      | 6.90  | %       |
| Gravel                   | 0.07  | %       |
| Silt                     | 22.96 | %       |
| Clay                     | 76.97 | %       |
| Cu                       | 62.40 | mg/kg   |
| Ni                       | 57.20 | mg/kg   |
| Hg                       | 3.13  | mg/kg   |
| As                       | 21.90 | mg/kg   |
| Pb                       | 87.80 | mg/kg   |
| Cd                       | 0.50  | mg/kg   |

Table S2 The composition of PAHs in the contaminated industrial soil.

| PAH<br>Congener        | Concentration<br>(mg kg <sup>-1</sup> ) | Proportion<br>(%) |
|------------------------|-----------------------------------------|-------------------|
| Naphthalene            | 13.8                                    | 0.6               |
| Acenaphthylene         | 66.7                                    | 2.7               |
| Acenaphthene           | 22.1                                    | 0.9               |
| Fluorene               | 33.3                                    | 1.3               |
| Phenanthrene           | 144.3                                   | 5.8               |
| Anthracene             | 56.5                                    | 2.3               |
| Fluoranthene           | 368.0                                   | 14.9              |
| Pyrene                 | 356.3                                   | 14.4              |
| Benzo[a]anthracene     | 219.3                                   | 8.9               |
| Chrysene               | 169.7                                   | 6.9               |
| Benzo[b]fluoranthene   | 205.9                                   | 8.3               |
| Benzo[k]fluoranthene   | 109.5                                   | 4.4               |
| Benzo[a]pyrene         | 285.1                                   | 11.5              |
| Indeno[1,2,3-cd]pyrene | 189.3                                   | 7.7               |
| Dibenz[a,h]anthracene  | 54.1                                    | 2.2               |
| Benzo[ghi]perylene     | 176.1                                   | 7.1               |
| Sum                    | 2469.9                                  | 100               |

Table S3 Degradation of PAHs with different oxidizing agents [1-10]

| Number     | Oxidant                                       | PAHs                 | Initial concentration of PAHs | Degradation rate |
|------------|-----------------------------------------------|----------------------|-------------------------------|------------------|
| Ref. 1     | PS                                            | light PAHs           | 1.559 mg/kg                   | 31%              |
|            |                                               | Heavy PAHs           | 2.667 mg/kg                   | 45%              |
|            |                                               | 16-PAHs              | 4.226 mg/kg                   | 39%              |
| Ref. 2     | PS                                            | 16-PAHs              | 1189±40 mg/kg                 | 16.16%           |
| Ref. 3     | PS                                            | PAHs                 | 16.98 mg/kg                   | 69.14%           |
| Ref. 4     | PS                                            | 16-PAHs              | 214±21 mg/kg                  | 47.66%           |
| Ref. 5     | CP/PS/OA-Fe <sup>2+</sup>                     | total-PAHs (2-6ring) | 137.8 mg/kg                   | 70.8%            |
| Ref. 6     | Fenton                                        | 16-PAHs              | 263.6±73.3 mg/kg              | 54.1%            |
|            | KMnO <sub>4</sub>                             |                      |                               | 90.0%            |
|            | Activated persulfate                          |                      |                               | 81.5%            |
| Ref. 7     | Soluble Fe(II) +citric acid or oxalic acid    | Naphthalene          | 0.2730 mg/kg                  | 89.5%            |
|            |                                               | Acenaphthene         | 0.3380 mg/kg                  |                  |
|            |                                               | Fluoranthene         | 0.1440 mg/kg                  |                  |
|            |                                               | Anthracene           | 2.0580 mg/kg                  |                  |
| Ref. 8     | KMnO <sub>4</sub>                             | Phenanthrene         | 340 mg/kg                     | 40.8%            |
|            |                                               | Benz[a]anthracene    | 218 mg/kg                     | 41.0%            |
|            |                                               | Benzo[a]pyrene       | 202 mg/kg                     | 46.0%            |
| Ref. 9     | KMnO <sub>4</sub> -Fenton                     | 27-PAHs              | 3090 mg/kg                    | 71%              |
| Ref. 10    | O <sub>3</sub> /H <sub>2</sub> O <sub>2</sub> | Fluoranthene         | 31.32 ng/mL                   | 89%              |
|            |                                               | Phenanthrene         | 107.15 ng/mL                  | 66%              |
|            |                                               | Anthracene           | 32.35 ng/mL                   | 71%              |
| This work* | HClO                                          | 16-PAHs              | 2469.9 mg/kg                  | 93.33%           |

Table S4 Integration details of pseudo-first-order dynamics

| Equation                    | y=a+b×x             |                     |                     |                     |                     |
|-----------------------------|---------------------|---------------------|---------------------|---------------------|---------------------|
| Cl <sub>2</sub> (mg/L)      | 1000                | 2000                | 3000                | 4000                | 5000                |
| Weight                      | Instrument          |                     |                     |                     |                     |
| Intercept                   | 0.41358±0<br>.00753 | 0.65518±0<br>.03212 | 0.74979±0<br>.01938 | 1.39288±0<br>.02403 | 1.53888±<br>0.03343 |
| Slope                       | 0.00194±0<br>.00117 | 0.01043±0<br>.00201 | 0.02339±0<br>.00186 | 0.02308±0<br>.00273 | 0.02454±<br>0.00152 |
| Sum of squares of residuals | 168.41485           | 38.93052            | 20.16404            | 7.34146             | 7.2901              |
| Pearson's                   | 0.59433             | 0.93301             | 0.98448             | 0.97316             | 0.99427             |
| R <sup>2</sup> (COD)        | 0.35323             | 0.87051             | 0.96921             | 0.94704             | 0.98858             |
| Adjusted R <sup>2</sup>     | 0.22388             | 0.83813             | 0.96305             | 0.9338              | 0.98477             |

Detailed equations were listed as follows. And statistical data were shown in Table S4.

Reaction kinetics could be described by a pseudo-first order model which was explicated in equation (1) and (2):

$$-\frac{dC}{dt} = k_{obs}t \quad (1)$$

$$\ln \frac{C_0}{C_t} = k_{obs}t \quad (2)$$

Where  $k_{obs}$  was the rate constant of pseudo-first-order reaction,  $t$  was the corresponding reaction time,  $C_0$  and  $C_t$  were the initial and instantaneous concentrations of PAHs, respectively.

Table S5 The chemical structures and physicochemical characteristics of anthracene, phenanthrene, pyrene and fluoranthene.

| PAH congener              | Chemical structure                                                                 | molecular weight<br>g mol <sup>-1</sup> | solubility<br>mg L <sup>-1</sup> | vapor pressure<br>mm Hg | log $K_{ow}$ |
|---------------------------|------------------------------------------------------------------------------------|-----------------------------------------|----------------------------------|-------------------------|--------------|
| Anthracene <sup>a</sup>   | 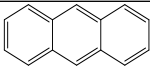  | 178.2                                   | 1.3                              | 6.56x10 <sup>-6</sup>   | 4.45         |
| Phenanthrene <sup>a</sup> | 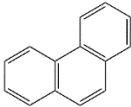  | 178.2                                   | 1.2                              | 1.21x10 <sup>-4</sup>   | 4.46         |
| Pyrene <sup>a</sup>       | 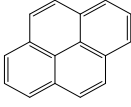  | 202.3                                   | 0.14                             | 4.50x10 <sup>-6</sup>   | 4.88         |
| Fluoranthene <sup>a</sup> | 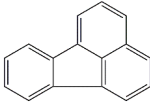 | 202.3                                   | 0.12                             | 9.22x10 <sup>-6</sup>   | 5.16         |

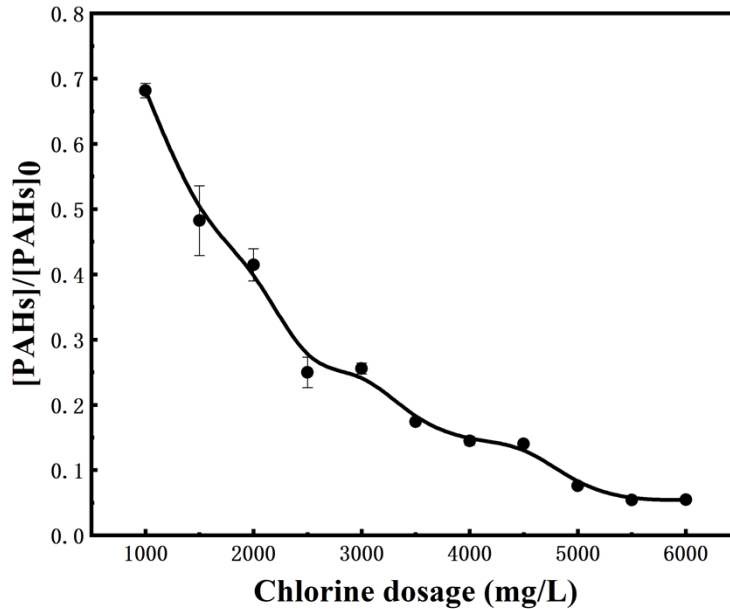

Fig. S1. The degradation of PAHs with different effective chlorine dosages.

To select the dose of effective chlorine, preliminary experiments were conducted. With an initial concentration of 2469.9 mg/kg, PAHs were degraded gradually by HClO oxidation with effective chlorine dosages ranging from 1000 to 6000 mg/L (Figure S1). It could be found that the degradation efficiency of PAHs increased with the increase of chlorine dosages. Moreover, when the chlorine dosage was higher than 5000 mg/L, the degradation efficiency of PAHs only increased slightly. Therefore, we set chlorine dosage as 1000, 2000, 3000, 4000, and 5000 mg/L for the time-dependent degradation of PAHs.

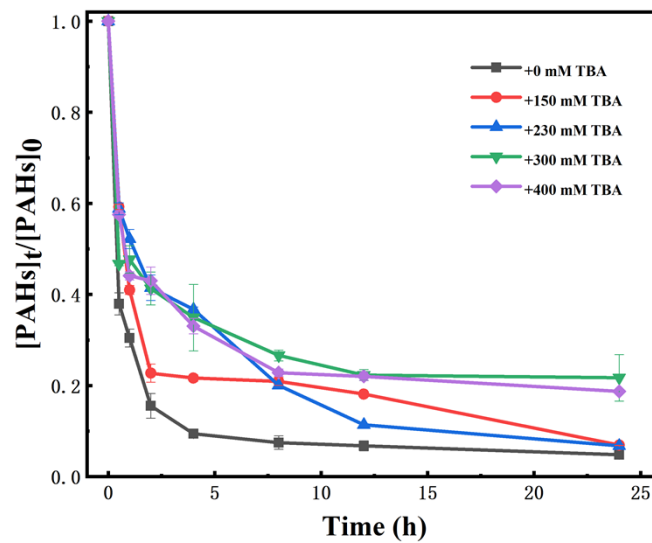

Fig.S2. The effect of TBA dosages on the PAHs degradation in the contaminated industrial soil by HOCl oxidation. Experimental conditions:  $[\text{PAHs}]_0 = 2469.9 \text{ mg/kg}$ ,  $[\text{Cl}_2]_0 = 5000 \text{ mg/L}$ ,  $\text{pH} = 5$ .

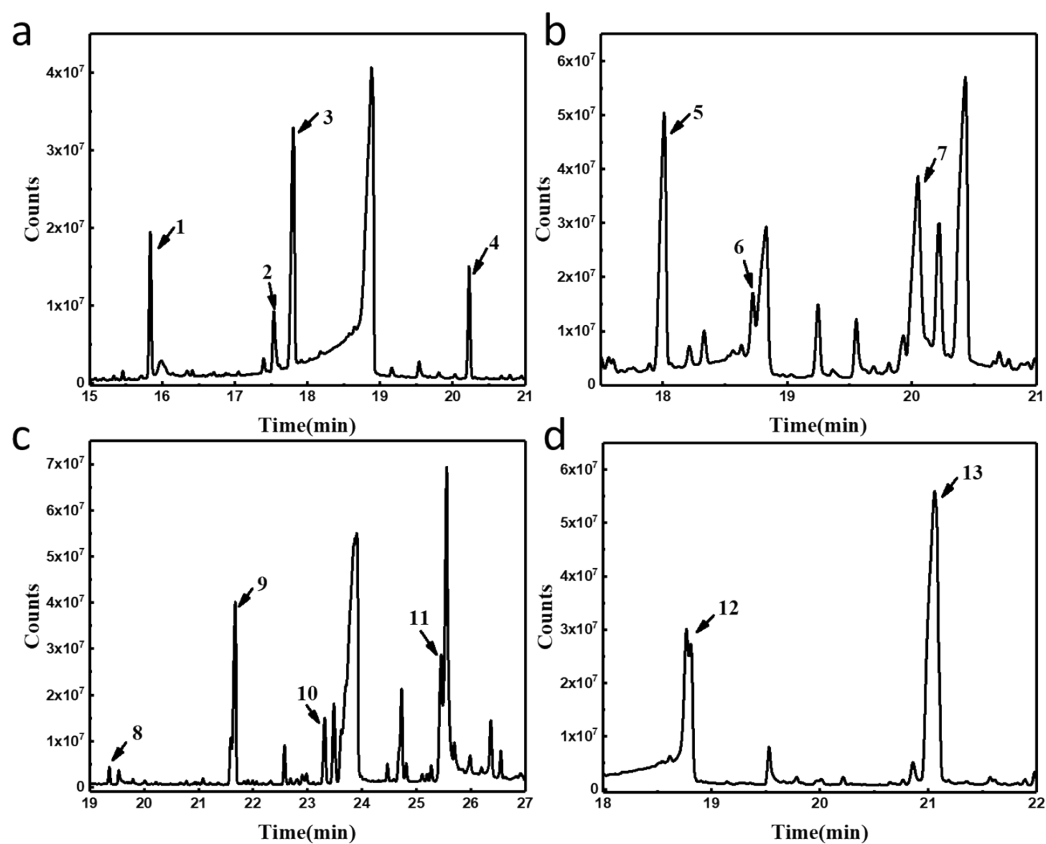

Fig.S3 Total ion chromatogram of degradation products by HOCl oxidation of (a) anthracene, (b) phenanthrene, (c) pyrene, and (d) fluoranthene. Experimental conditions:  $[\text{PAHs}]_0 = 1 \text{ mg/L}$ ,  $[\text{Cl}_2]_0 = 100 \text{ mg/L}$ ,  $\text{pH} = 5$ , reaction time = 12 h.

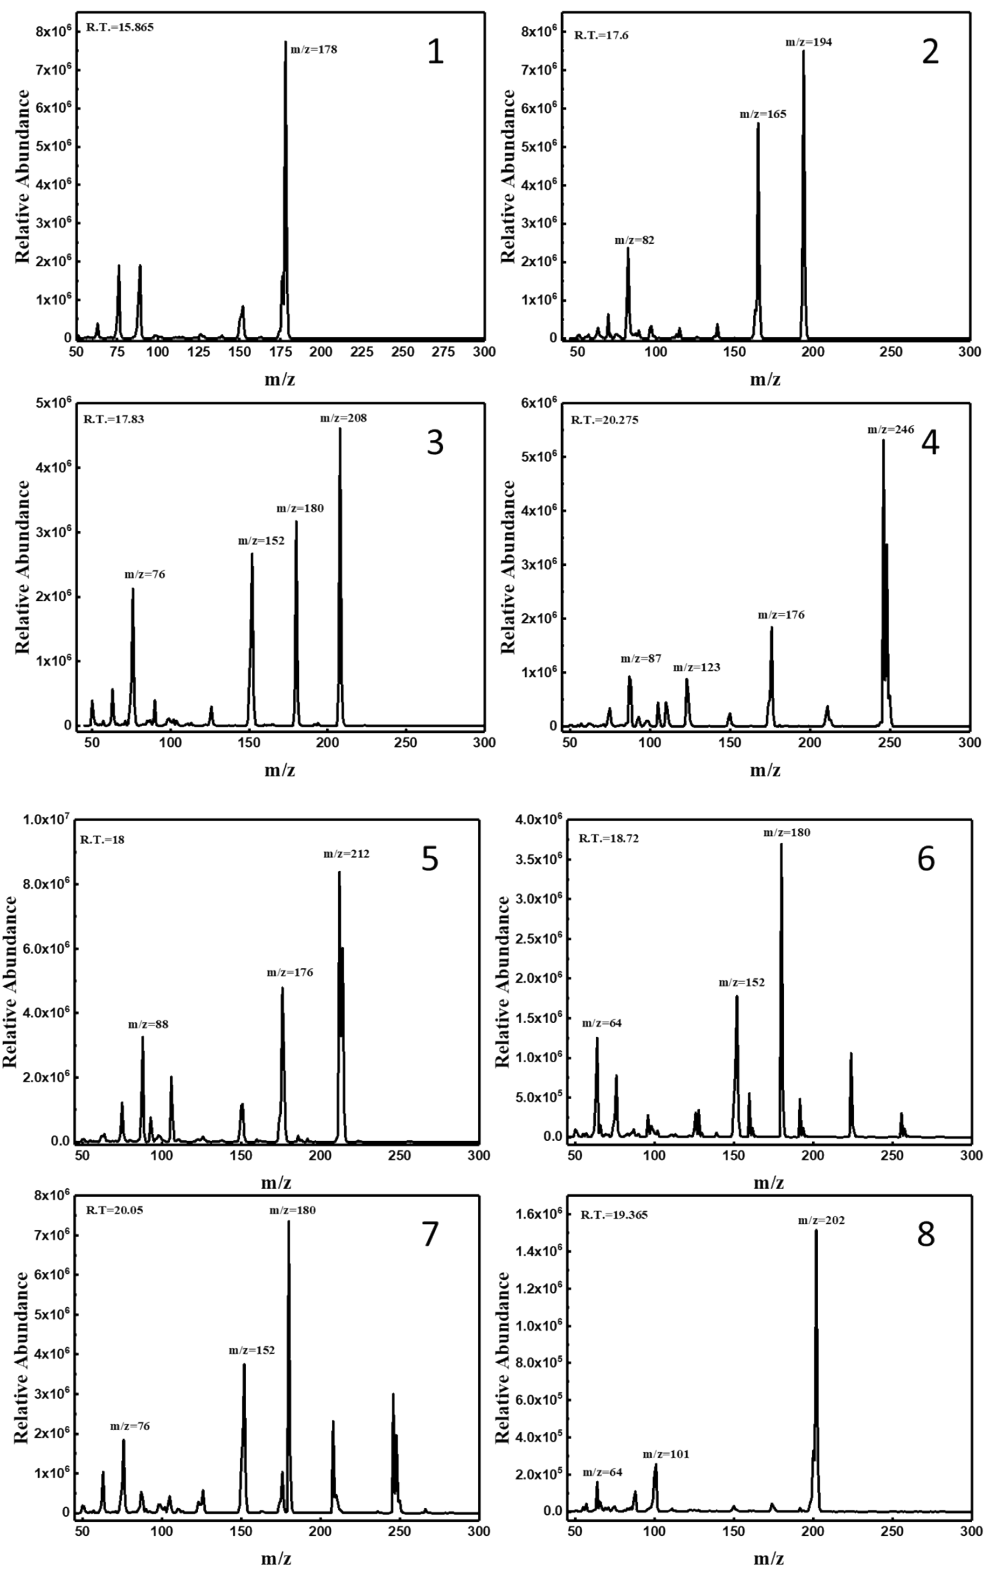

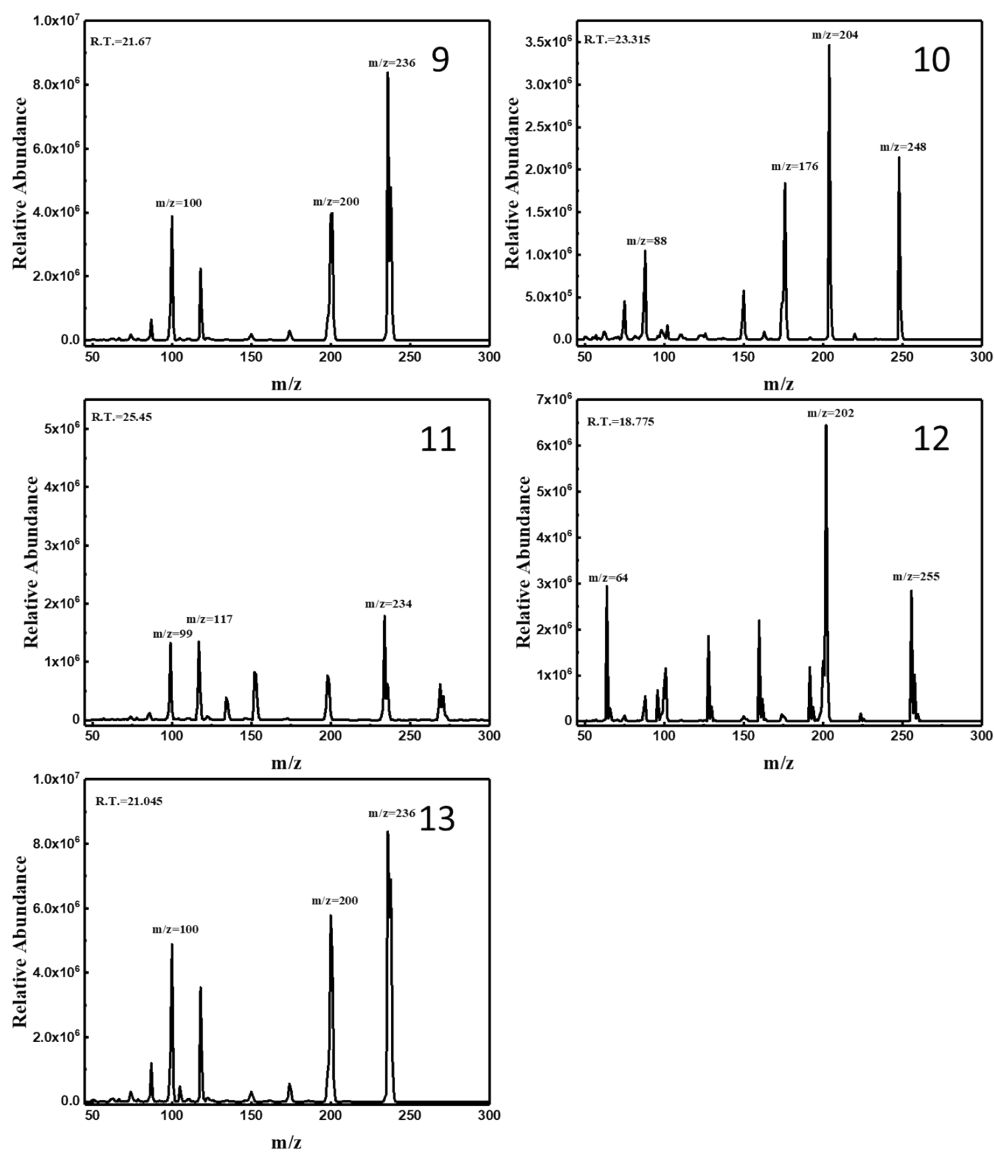

Fig. S4 Mass spectra of anthracene, phenanthrene, pyrene, fluoranthene and their degradation intermediates by HOCl oxidation. R.T.=retention time. Experimental conditions:  $[PAHs]_0 = 1 \text{ mg/L}$ ,  $[Cl_2]_0 = 100 \text{ mg/L}$ ,  $pH = 5$ , reaction time = 12 h.

## References:

- [1] Y. J. Shih, N. T. Binh, C. W. Chen, C. F. Chen, C. D Dong, Treatability assessment of polycyclic aromatic hydrocarbons contaminated marine sediments using permanganate, persulfate and fenton oxidation processes, *Chemosphere*, 2016, **150**, 294-303.
- [2] B. Ranc, P. Faure, V. Croze, C. Lorgeoux, M. O. Simonnot, Comparison of the effectiveness of soil heating prior or during in situ chemical oxidation (ISCO) of aged PAH-contaminated soils, *Environ. Sci. Pollut. Res. Int.*, 2017, **24**, 11265-11278.
- [3] Y. Song, G. Fang, C. Zhua, F. Zhu, S. Wu, N. Chen, T. Wu, Y. Wang, J. Gao, D. Zhou, Zero-valent iron activated persulfate remediation of polycyclic aromatic hydro-carbon-contaminated soils: an in situ pilot-scale study, *Chem. Eng. J.*, 2019, **355**, 65-75.
- [4] R. Medina, P.M. David Gara, N.G.L. Aj, J.A. Rosso, M.T. Del Panno, Remediation of a soil chronically contaminated with hydrocarbons through persulfate oxidation and bioremediation, *Sci. Total Environ.*, 2018, **618**, 518-530.
- [5] J. Wang, X. Zhang, X. Zhou, M. Waigi, F. Gudda, C. Zhang, W. Ling, Promoted oxidation of polycyclic aromatic hydrocarbons in soils by dual persulfate/calcium peroxide system, *Sci. Total Environ.*, 2021, **758**, 143680.
- [6] X. Liao, Z. Wu, Y. Li, H. Cao, C. Su, Effect of various chemical oxidation reagents on soil indigenous microbial diversity in remediation of soil contaminated by PAHs, *Chemosphere*, 2019, **226**, 483-491.
- [7] Z. Xu, Q. Li, W. Michael, C. Peng, Y. Bing, W. Jian, L. Wan, Removal of bound PAH residues in contaminated soils by Fenton oxidation, *Catalysts.*, 2019, **9**, 619.
- [8] B. Malika, T. Lan, et.al., Optimization of PAHs oxidation from a concentrate of soil attrition using potassium permanganate, *Soil and Sediment Contamination*, 2017, **26**, 605-622.
- [9] B. Malika, D. Justine, T. Lan, C. Lucie, M. Guy, B. Jean, Polycyclic aromatic hydrocarbon oxidation from concentrates issued from an attrition process of polluted soil using the fenton reagent and permanganate, *Water Air Soil Pollut.*, 2017, **228**, 115.
- [10] N. Xun, S. Ling, S. Jian, L. Chao, Z. Ya, Y. Zuo, C. Shu, Degradation of polycyclic aromatic hydrocarbons (PAHs) in textile dyeing sludge by O<sub>3</sub>/H<sub>2</sub>O<sub>2</sub> treatment, *RSC Adv.*, 2015, **5**, 38021-38029.
